# Supplementary material
Source: publisher figshare collection journal article supplement (https://acs.figshare.com/ndownloader/files/4555921)
Supplement: Supplementary file 1 [file 4555921]

**Supporting Information for “A Versatile Strategy for the Synthesis of  
Dendron-like Polypeptide/Linear Poly( $\epsilon$ -caprolactone) Block  
Copolymers via Click Chemistry”**

Chong Hua<sup>1</sup>, Chang-Ming Dong<sup>1,\*</sup>, Yen Wei<sup>1,2</sup>

<sup>1</sup>Department of Polymer Science & Engineering, School of Chemistry and Chemical  
Technology, Shanghai Jiao Tong University, Shanghai 200240, P. R. China

<sup>2</sup>Department of Chemistry, Drexel University, Philadelphia, Pennsylvania 19104, USA

Submitted as an Article to *Biomacromolecules*

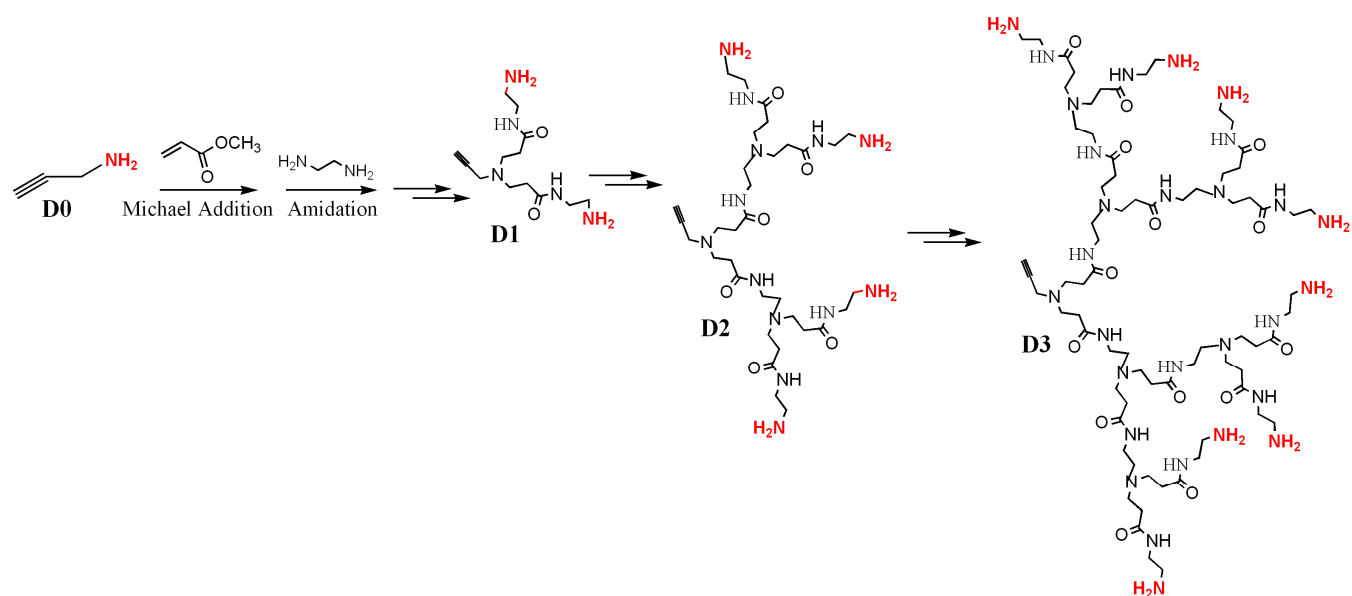

**S1.** Synthesis of propargyl focal point PAMAM-typed dendrons **Dm**.

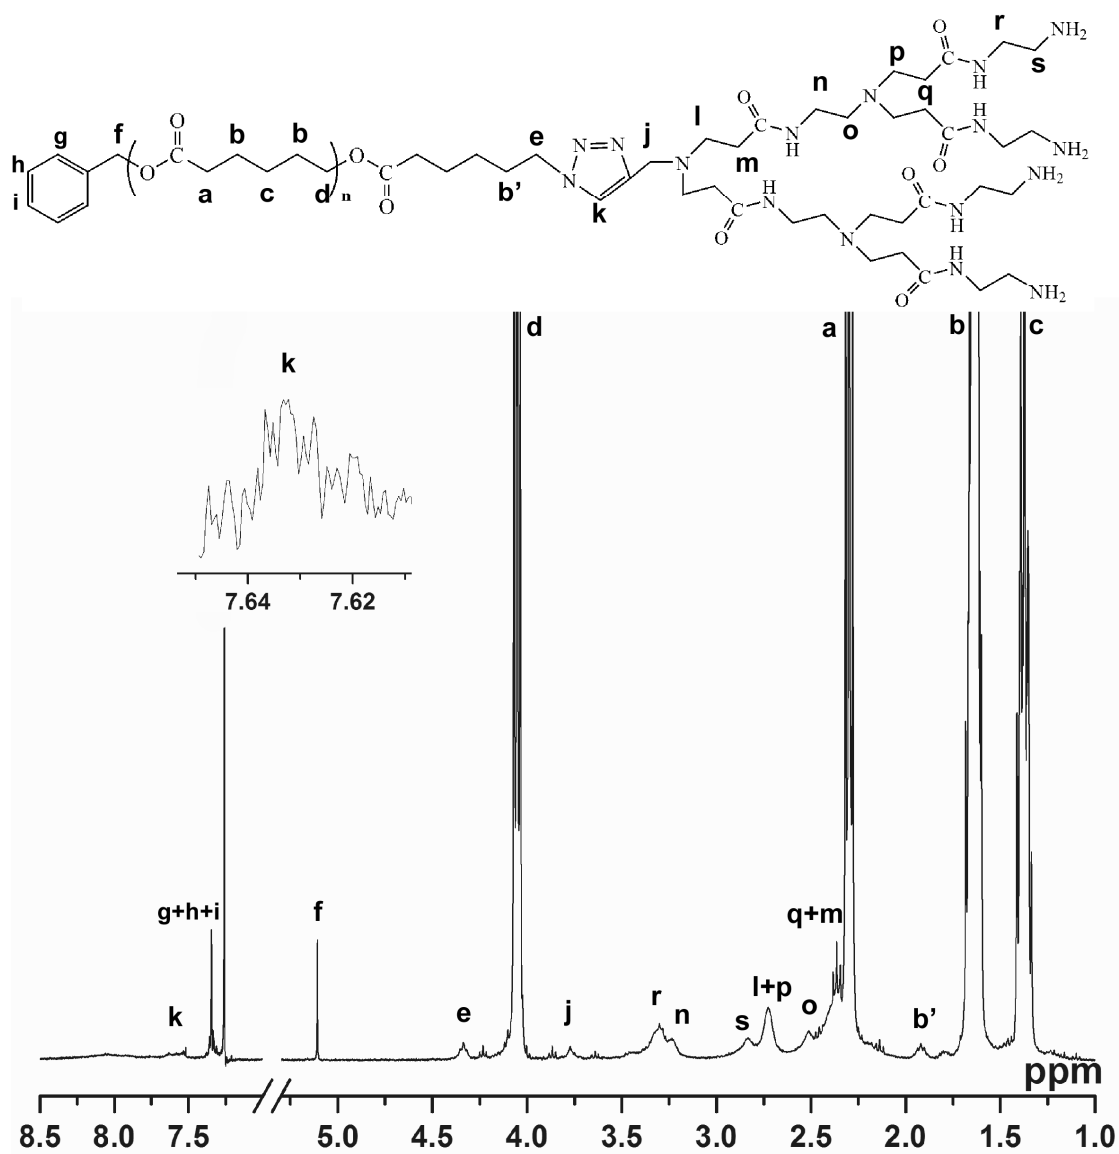

**S2.**  $^1\text{H}$  NMR spectrum ( $\text{CDCl}_3$ ) of PCL<sub>40</sub>-D2 sample.

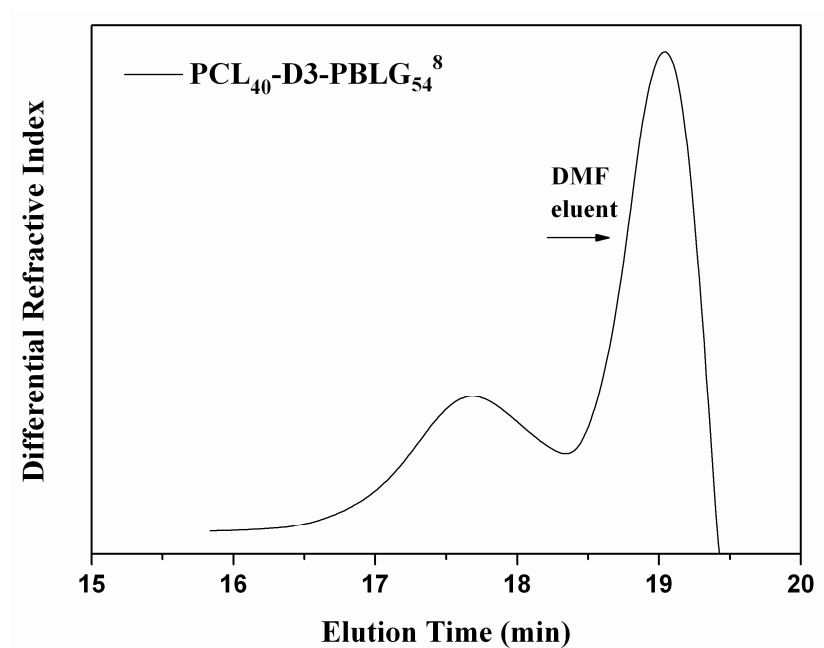

**S3.** GPC trace of  $\text{PCL}_{40}\text{-D3-PBLG}_{54}^8$  sample.

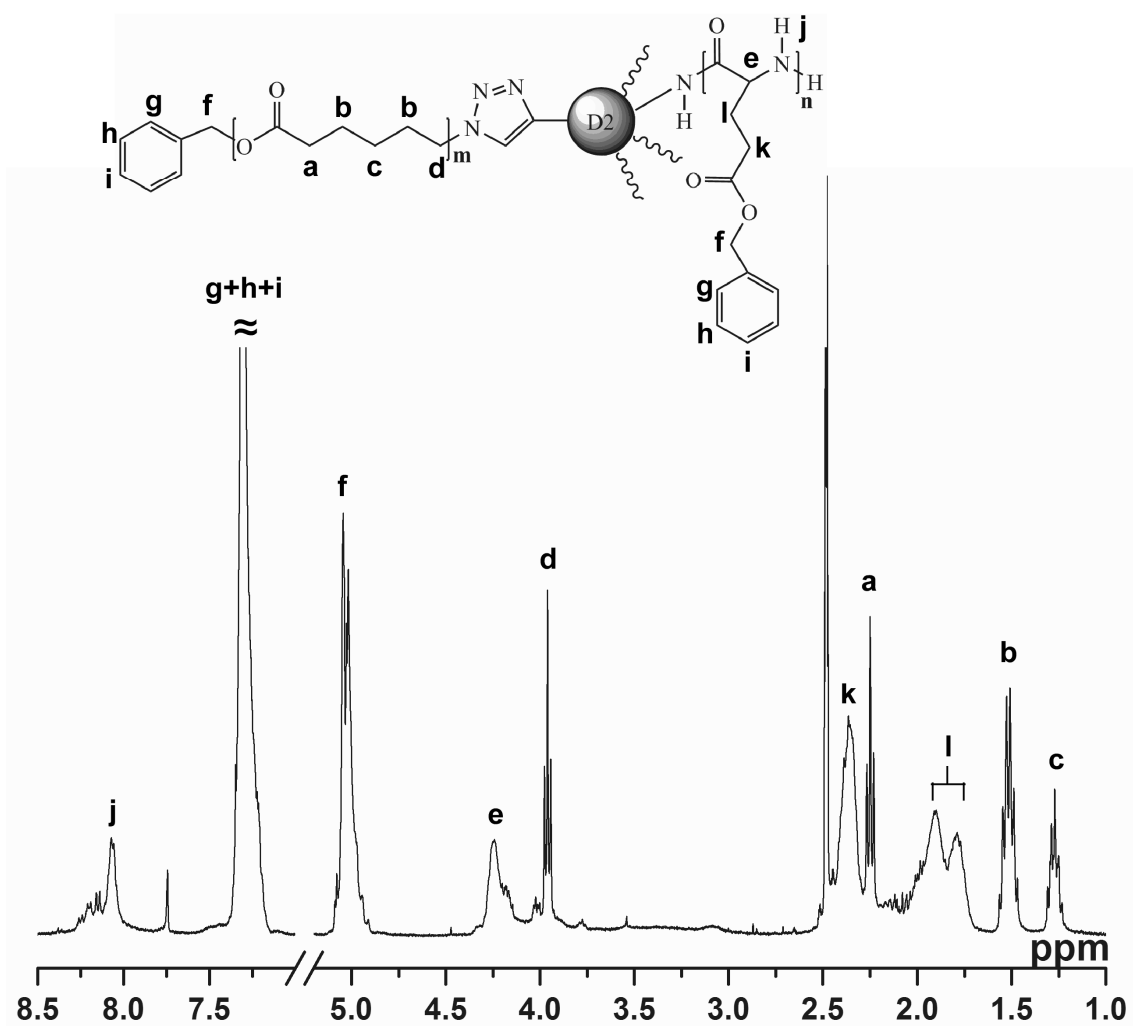

**S4.**  $^1\text{H}$  NMR spectrum ( $\text{D}_6\text{-DMSO}$ ) of  $\text{PCL}_{40}\text{-D}_2\text{-PBLG}_{38}$  sample.

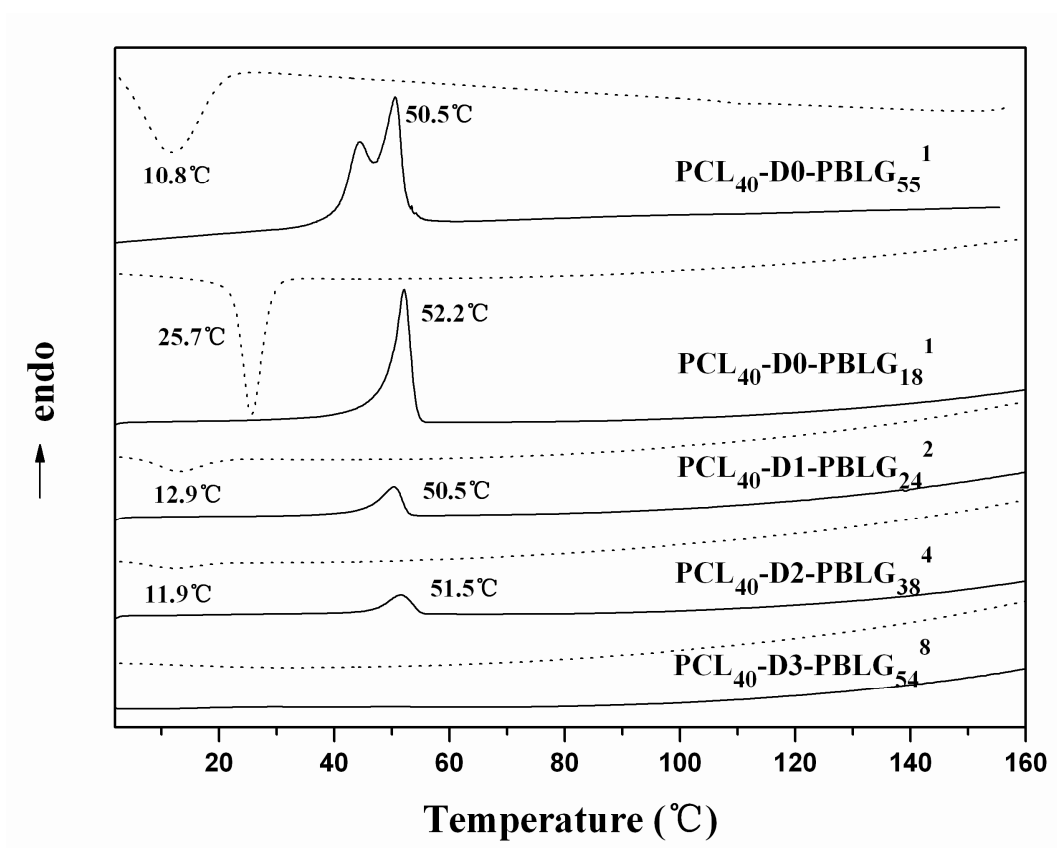

**S5.** DSC curves of the PCL<sub>40</sub>-Dm-PBLG block copolymers in the cooling run (dotted lines) and in the second heating run (solid lines).
